# Supplementary material for: Fast and exact search for the partition with minimal information loss
Source: PubMed Central journal article supplement (PMC6133274; doi:10.1371/journal.pone.0201126), 2018-09-11
Supplement: pone.0201126.s001.pdf [file pone.0201126.s001.pdf]

# Fast and exact search for the partition with minimal information loss

Shohei Hidaka<sup>1\*</sup>, Masafumi Oizumi<sup>2,3</sup>,

**1** Japan Advanced Institute of Science and Technology, Nomi-shi, Ishikawa, Japan

**2** Araya Inc., Minato-ku, Tokyo, Japan

**3** RIKEN Brain Science Institute, Wako-shi, Saitama, Japan

\*shhidaka@jaist.ac.jp

## Supporting information 1: Queyranne’s algorithm

In this appendix, we briefly describe Queyranne’s algorithm [1]. Suppose we have a submodular system  $(V, g)$  where  $V$  is a given set of elements and  $g$  is a submodular function defined for the power set of  $V$ . Let  $f(U) := g(U) + g(V \setminus U)$  for every subset  $U \subseteq V$  be a symmetric function constructed with the submodular function  $g$ . Queyranne’s algorithm is used to search the subset  $U$  which minimizes the symmetric submodular function  $f(U)$ . For example, in this study, we consider the case that  $f(U) = 2I(U; V \setminus U)$ , identified up to a constant multiplier, and  $g(U) = I(U; V \setminus U)$  are both mutual information (Eq. 2)

$$f(M) := I(M; \overline{M}), \tag{1}$$

$$= H(M) + H(\overline{M}) - H(M, \overline{M}). \tag{2}$$

In the algorithm proposed in [1], the key observation is that a special ordered pair  $(t, u)$ , called a *pendent pair*, can be identified for an arbitrary subset  $U \subseteq V$  in  $O(N^2)$  time. Identification of a pendent pair  $(t, u)$  of the set  $V$  reduces the search space because for the desired subset  $U$  minimizing  $f(U)$ , either case (1)  $U = \{u\}$  or (2)  $U \supseteq \{t, u\}$  holds. Thus, by keeping case (1) as a candidate for the minimal partition, we can further refine case (2), in which we define a new ground set  $V'$  where the elements  $\{t, u\}$  are treated as an inseparable unit element  $u'$ . By using the new merged element  $u'$ ,  $V'$  is defined as

$$V' := \{V \setminus \{t, u\}\} \cup \{u'\}.$$

After this procedure is applied once, the effective number of elements is reduced to  $N - 1$ . By applying this procedure recursively to search the set  $V'$  with  $N - 1$  elements, we would obtain another candidate for the minimal partition and a candidate set  $V''$  with  $N - 2$  elements for further search. Thus, by finding the pendent pair for the given set  $V$  at each step recursively, we obtain  $N - 1$  candidates for the minimal partition, and then find the minimal one from among them. In summary, this recursive computation takes  $O(N^3)$  time because it requires the construction of a series of pendent pairs in  $O(N^2)$ , and  $N - 1$  pendent pairs are needed to construct for minimization.

Next we illustrate the construction of a pendant pair. An ordered pair  $(t, u)$  of elements of  $V$  is called a pendent pair for  $(V, g)$ , if  $f(u)$  takes the minimum in all subsets of  $V$  which separate  $t$  from  $u$ , or equivalently

$$f(u) = \min\{f(U) \mid U \subset V, t \notin U \text{ and } u \in U\}.$$

There is at least one pendent pair for any symmetric submodular function. Further, a pendent pair can be constructed specifically for an element  $x \in V$  as follows. For an element  $x \in V$ , let us write  $v_1 := x$ ,  $W_0 = \emptyset$ , and  $W_1 = \{v_1\}$ . For  $i > 1$ ,

$$v_i := \arg \min_{u \in V \setminus W_{i-1}} g(W_{i-1} \cup \{u\}) - g(\{u\}),$$

and  $W_i := W_{i-1} \cup \{v_i\}$ . For a set  $V$  of the size  $N = |V|$ , the  $(v_{N-1}, v_N)$  is a pendent pair. This construction of a pendent pair needs  $O(N^2)$  times of evaluation of the function  $f$ . Importantly, for all  $y \in V \setminus W_i$  and all  $x \subseteq W_{i-1}$  in the series  $(W_i)_{i=1}^N$  constructed by the procedure above for the submodular system  $(V, f)$ , the following inequality holds

$$g(W_i) + g(y) \leq g(W_i \setminus X) + g(X + y).$$

See [1] for the proof of this inequality. By putting  $i = N - 1$  in the inequality, we can see that the partition  $(v_N, V \setminus \{v_N\})$  gives the minimum among all subsets separating  $v_N$  from  $v_{N-1}$ .

By definition of the pendent pair, one of the following two cases, case 1 or 2, holds for a given pendent pair  $(t, u)$ .

1. The set  $\{u\}$  is a solution of the minimization problem.
2. Some set  $U \supseteq \{t, u\}$  is a solution of the minimization problem.

In the first case, the algorithm reports it. In the second case, the algorithm constructs another submodular system  $(V', f)$ , in which a new element is defined by merging the pendent pair  $u' = \{t, u\}$  and  $V' = V \setminus \{t, u\} \cup u'$ . The new system  $(V', f)$  with the merged pair is also submodular, and thus the same argument for the pendent pair can apply recursively.

## References

1. Queyranne M. Minimizing symmetric submodular functions. *Mathematical Programming*. 1998;82(1-2):3–12.
