# Supplementary material for: Fast and exact search for the partition with minimal information loss
Source: PubMed Central journal article supplement (PMC6133274; doi:10.1371/journal.pone.0201126), 2018-09-11
Supplement: pone.0201126.s002.pdf [file pone.0201126.s002.pdf]

# Fast and exact search for the partition with minimal information loss

Shohei Hidaka<sup>1\*</sup>, Masafumi Oizumi<sup>2,3</sup>,

**1** Japan Advanced Institute of Science and Technology, Nomi-shi, Ishikawa, Japan

**2** Araya Inc., Minato-ku, Tokyo, Japan

**3** RIKEN Brain Science Institute, Wako-shi, Saitama, Japan

\*shhidaka@jaist.ac.jp

## Supporting information 2: Extension to $k$ -partition algorithm

The Queyranne’s algorithm [1] works on minimization of  $g(U) = f(U) + f(V \setminus U)$  with respect to non-empty set  $U \subset V$  or  $g((U, V \setminus U)) = f(U) + f(V \setminus U)$  over bi-partition  $(U, V \setminus U)$  with an arbitrary submodular set function  $f$ . Here we show a recursive method extending this symmetric submodular search over a set of bi-partitions to that of 3-partitions. The following argument will be easily extended to that of  $k$ -partition.

First let us denote the set of  $k$ -partitions of a given set  $V$  by

$$P_{k,V} := \left\{ (M_0, M_1, \dots, M_{k-1}) \mid \bigcup_i M_i = V, M_i \cap M_j = \emptyset \text{ for any } i \neq j \text{ and, } M_i \neq \emptyset \text{ for every } i \right\}$$

For a submodular system  $(V, f)$  of a given underlying set  $V$  and a submodular set function  $f : 2^V \mapsto \mathbb{R}$ , we consider minimization of function  $g : P_{3,V} \mapsto \mathbb{R}$  of the form

$$g((M_0, M_1, M_2)) = \sum_{i=0}^2 f(M_i) + c, \tag{1}$$

where  $c \in \mathbb{R}$  is a constant. This is an extension of the bi-partition function  $g((U, V \setminus U)) = f(U) + f(V \setminus U)$  to 3-partition function. In this section, we provide an algorithm to minimize this  $k$ -partition function by employing Queyranne’s algorithm.

By defining  $f(M) := H(M)$  for  $M \subseteq V$ ,  $(V, f)$  is a submodular system, and the information loss function is written with a constant  $c = -f(V)$  by

$$g((M_0, M_1, M_2)) = \sum_{i=0}^2 f(M_i) - f(V).$$

For the special case  $k = 2$ ,  $g((M_0, M_1)) = I(M_0; M_1)$ , this is identical to the minimal loss of information introduced in this study.

Our argument below does not depend on any specific form of a particular submodular function  $f$ , as long as the objective function takes the form in (1). The basic idea is to reduce the original objective function  $g : P_{3,V} \mapsto \mathbb{R}$  to a set function  $g_{3,V} : 2^V \mapsto \mathbb{R}$  by recursively defining  $g_{2,U}$  for the remaining two subsets in a given bi-partition. As our goal is to minimize  $g_{3,V}$ , such reduction can be written specifically for non-empty  $U \subset V$  by

$$g_{3,V}(U) := f_V(U) + h_{2,V}(U), \tag{2}$$

where for any  $\emptyset \subset U_1 \subset U_2$ ,  $f_{U_2}(U_1) := f(U_1) + f(U_2 \setminus U_1)$  and  $h_{1,U_2}(U_1) := 0$  and 21

$$h_{2,U_2}(U_1) := \begin{cases} \min \begin{cases} \min_{\emptyset \subset U' \subset U_2 \setminus U_1} g_{2,U_2 \setminus U_1}(U') & (\min(|U_1|, |U_2 \setminus U_1|) > 1) \\ \min_{\emptyset \subset U' \subset U_1} g_{2,U_1}(U') & \end{cases} \\ \min_{\emptyset \subset U' \subset U_2 \setminus U_1} g_{2,U_2 \setminus U_1}(U') & (|U_1| = 1) \\ \min_{\emptyset \subset U' \subset U_1} g_{2,U}(U') & (|U_2 \setminus U_1| = 1) \end{cases} \quad (3)$$

This function (2) can be interpreted as recursive bi-partitioning across multiple stages: 22  
 The first partition  $(U, V \setminus U)$  of the set  $V$  is made on  $f_V$ , and the second partition 23  
 $(U', \bar{U}')$  of either  $U$  or  $V \setminus U$  on  $h_{k-1}$ , and so forth. For  $|U| = 1$  or  $|V \setminus U| = 1$ , there is 24  
 only one set for which the second partition can be made, otherwise smaller one of 25  
 either  $f_U(M_0)$  or  $f_{V \setminus U}(M_0)$  has the solution. For  $k = 2$ ,  $g_{2,V}(U) = f_V(U)$ , and 26  
 minimization of  $f_V(U)$  over the set of bi-partitions of  $V$  can be computed by the 27  
 Queyranne's algorithm. 28

If this function  $g_{3,V}$  is symmetric and submodular, we can apply the Queyranne's 29  
 algorithm to this function at every recursive step above. Then, the minimum of 30  
 $g_{3,V}(\hat{U})$  is identical to  $g((\hat{U}, M_0, M_1))$  with the 3-partition is  $(\hat{U}, \hat{M}_0, \hat{M}_1)$  such that 31

$$\hat{U} = \arg \min_{\emptyset \subset U \subset V} g_{3,V}(U) \text{ and } (\hat{M}_0, \hat{M}_1) = \arg \min_{(M_0, M_1) \in P_{2, V \setminus \hat{U}}} h_2(M_0, M_1)$$

or  $(V \setminus \hat{U}, \hat{M}_0, \hat{M}_1)$  such that 32

$$\hat{U} = \arg \min_{\emptyset \subset U \subset V} g_{3,V}(U) \text{ and } (\hat{M}_0, \hat{M}_1) = \arg \min_{(M_0, M_1) \in P_{2, \hat{U}}} h_2(M_0, M_1).$$

As  $g_{k,V}$  is obviously symmetric by definition, our main question now is whether it is 33  
 submodular. The lemma following states that it is submodular. 34

**Lemma 1.** For a given submodular system  $(V, f)$ , the function  $g_{3,V} : 2^V \mapsto \mathbb{R}$  is 35  
 submodular. 36

The proof of Lemma 1 needs Lemma 2 which is stated after the proof. 37

*Proof.* For a pair of set  $X, Y \subseteq V$  and  $k > 2$ , consider the difference 38

$$\Delta := g_{3,V}(X) + g_{3,V}(Y) - g_{3,V}(X \cup Y) - g_{3,V}(X \cap Y),$$

and 39

$$\Delta_h := h_{3,V}(X) + h_{3,V}(Y) - h_{3,V}(X \cup Y) - h_{3,V}(X \cap Y).$$

As  $\Delta - \Delta_h \geq 0$  due to submodularity of the function  $f$ ,  $\Delta_h \geq 0$  implies  $\Delta \geq 0$  for any 40  
 $k$ . We show  $\Delta_h \geq 0$  as follows. Now we will show that  $\Delta_h \geq 0$ , by using the fact that 41  
 any function  $g_{2,U}$  for  $U \subseteq V$  is submodular. 42

Let us denote the minimizer of  $g_{3,X}$  by

$$[X] := \arg \min_{\emptyset \subset W \subset X} g_{3,X}(W).$$

For all three cases of the function  $h$  (3), we consider the case below as the lower bound 43  
 for  $\Delta_h$ , and the other cases follow the essentially same argument: 44

$$\Delta_h \geq g_{3,X}([X]) + g_{3,Y}([Y]) - g_{3,X \cup Y}([X \cup Y]) - g_{3,X \cap Y}([X \cap Y])$$

By definition,  $g_{3,X}([X]) \leq g_{3,X}(W)$  for any non-empty  $W \subset X$ , and thus for any 45  
 non-empty  $W \subset X \cup Y$  and  $Z \subset X \cap Y$ , we have 46

$$\Delta_{h,3} \geq g_{3,X}([X]) + g_{3,Y}([Y]) - g_{3,X \cup Y}(W) - g_{3,X \cap Y}(Z).$$

By Lemma 2,  $\Delta_h \geq 0$  due to submodularity of  $g_{2,U}$  for any  $U \subseteq V$ . 47 □

The last line in the proof of Lemma 1 is shown as follows.

**Lemma 2.** For an arbitrary submodular system  $(V, f)$ ,  $f(\emptyset) = 0$  and  $\emptyset \subset W \subset Z \subseteq V$ , write

$$f_Z(W) := f(W) + f(Z \setminus W).$$

For any given pair of partitions  $(W, \overline{W}) \in P_{2, X \cup Y}$  and  $(Z, \overline{Z}) \in P_{2, X \cap Y}$ , there is some pair  $(A, \overline{A}) \in P_{2, X}$  and  $(B, \overline{B}) \in P_{2, Y}$  which holds the inequality

$$f_X(A) + f_Y(B) \geq f_{X \cup Y}(W) + f_{X \cap Y}(Z).$$

Vice versa, for any given pair of partitions  $(A, \overline{A}) \in P_{2, X}$  and  $(B, \overline{B}) \in P_{2, Y}$ , there is some pair  $(W, \overline{W}) \in P_{2, X \cup Y}$  and  $(Z, \overline{Z}) \in P_{2, X \cap Y}$  which holds the inequality above.

This lemma states about a kind of submodularity on the bi-partition function  $f_X$  by existence of some pair  $W$  and  $Z$  for any pair  $A$  and  $B$  or vice versa. The proof of Lemma 2 is beyond the scope of this section, and will be reported elsewhere.

The Lemma 1 states that Queyranne's algorithm can be used to minimize the symmetric submodular set function  $g_{m,U}(U')$  with respect to non-empty  $U' \subset U$  at each step of the function  $g_{k,V}(U)$ . This observation further applies recursively for a  $k$ -partition problem, which can be reduced to the minimization of  $(k - 1)$ -partition problem by defining an appropriate function. As minimization of a  $k$ -partition function includes the minimization of  $(k - 1)$ -partition function, the computational time of this recursive algorithm for the minimal  $k$ -partition of  $n$  elements would take the order  $O(n^{3(k-1)})$ .

## References

1. Queyranne M. Minimizing symmetric submodular functions. *Mathematical Programming*. 1998;82(1-2):3–12.
